# Supplementary material
Source: PubMed Central journal article supplement (PMC1413755)

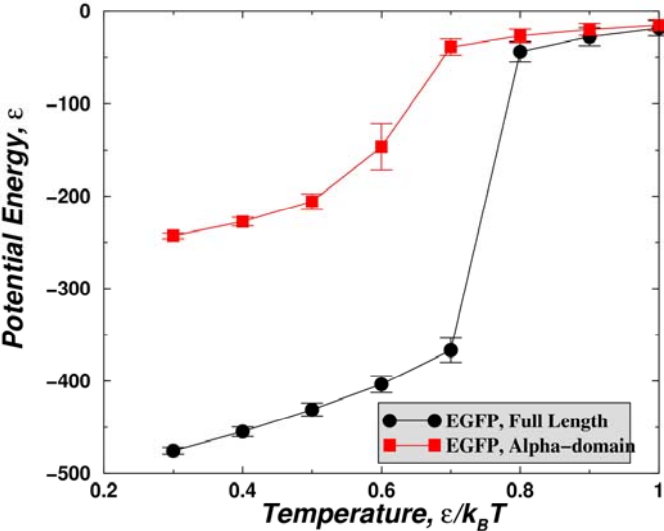

Supplement: pnas_0511078103_1.pdf [file pnas_0511078103_1.pdf]

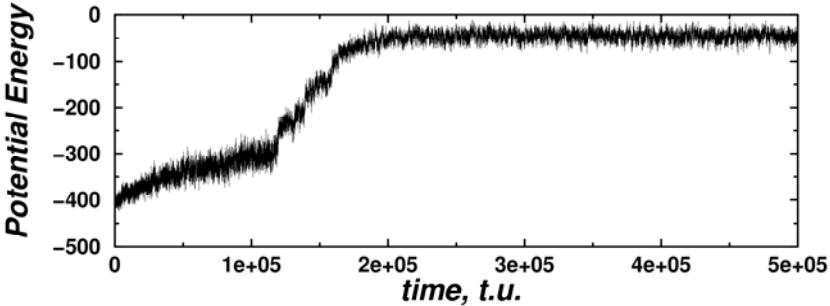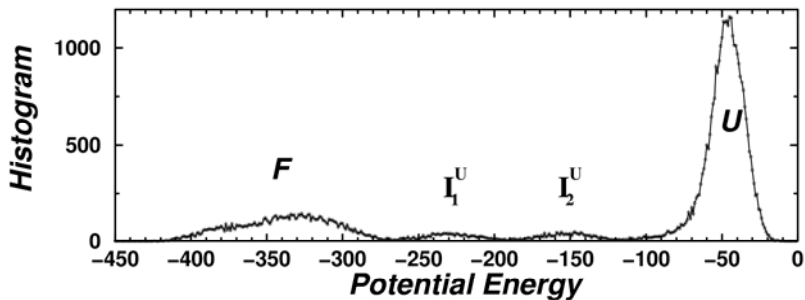

Supplement: pnas_0511078103_2.pdf [file pnas_0511078103_2.pdf]

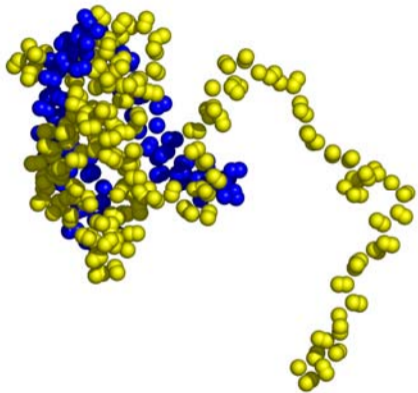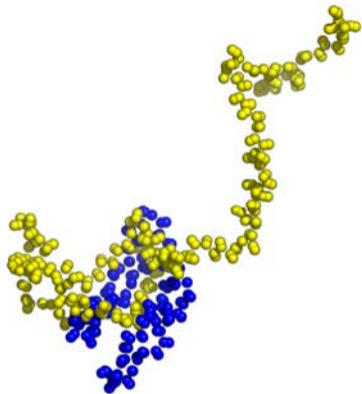

Supplement: pnas_0511078103_3.pdf [file pnas_0511078103_3.pdf]

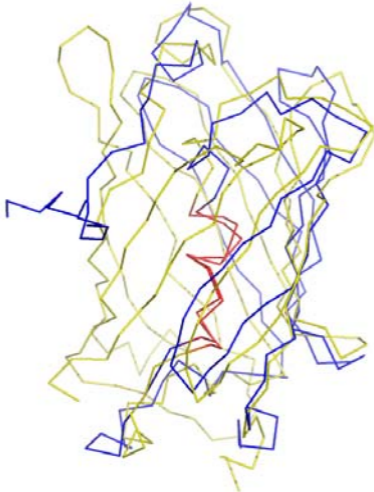

Supplement: pnas_0511078103_4.pdf [file pnas_0511078103_4.pdf]
